# Supplementary material for: Cycles of myofiber degeneration and regeneration lead to remodeling of the neuromuscular junction in two mammalian models of Duchenne muscular dystrophy
Source: PubMed Central journal article supplement (PMC6209224; doi:10.1371/journal.pone.0205926), 2018-10-31
Supplement: pone.0205926.s005.pdf [file pone.0205926.s005.pdf]

| WT      |            | Stable     |            | Dynamic    |            | Lost |
|---------|------------|------------|------------|------------|------------|------|
|         |            | Continuous | Fragmented | Continuous | Fragmented |      |
| Stable  | Continuous |            | ***        | ***        | ***        | ***  |
|         | Fragmented |            |            | ns         | ns         | ns   |
| Dynamic | Continuous |            |            |            | ns         | ns   |
|         | Fragmented |            |            |            |            | ns   |

| mdx     |            | Stable     |            | Dynamic    |            | Lost |
|---------|------------|------------|------------|------------|------------|------|
|         |            | Continuous | Fragmented | Continuous | Fragmented |      |
| Stable  | Continuous |            | ns         | ***        | ns         | ***  |
|         | Fragmented |            |            | ***        | ns         | ***  |
| Dynamic | Continuous |            |            |            | ***        | ns   |
|         | Fragmented |            |            |            |            | ***  |
