# Supplementary material for: Cycles of myofiber degeneration and regeneration lead to remodeling of the neuromuscular junction in two mammalian models of Duchenne muscular dystrophy
Source: PubMed Central journal article supplement (PMC6209224; doi:10.1371/journal.pone.0205926), 2018-10-31
Supplement: pone.0205926.s006.pdf [file pone.0205926.s006.pdf]

| WT Internal Control |            | Stable     |            | Dynamic    |            | Lost |
|---------------------|------------|------------|------------|------------|------------|------|
|                     |            | Continuous | Fragmented | Continuous | Fragmented |      |
| Stable              | Continuous |            | ***        | ***        | ***        | ***  |
|                     | Fragmented |            |            | ns         | ns         | ns   |
| Dynamic             | Continuous |            |            |            | ns         | ns   |
|                     | Fragmented |            |            |            |            | ns   |

| WT Endplate Damage |            | Stable     |            | Dynamic    |            | Lost |
|--------------------|------------|------------|------------|------------|------------|------|
|                    |            | Continuous | Fragmented | Continuous | Fragmented |      |
| Stable             | Continuous |            | ***        | ***        | ***        | ***  |
|                    | Fragmented |            |            | ns         | ns         | ns   |
| Dynamic            | Continuous |            |            |            | *          | ns   |
|                    | Fragmented |            |            |            |            | ***  |
