# Supplementary material for: Cycles of myofiber degeneration and regeneration lead to remodeling of the neuromuscular junction in two mammalian models of Duchenne muscular dystrophy
Source: PubMed Central journal article supplement (PMC6209224; doi:10.1371/journal.pone.0205926), 2018-10-31
Supplement: pone.0205926.s007.pdf [file pone.0205926.s007.pdf]

| mdx Internal Control |            | Stable     |            | Dynamic    |            | Lost |
|----------------------|------------|------------|------------|------------|------------|------|
|                      |            | Continuous | Fragmented | Continuous | Fragmented |      |
| Stable               | Continuous |            | ***        | ***        | **         | ***  |
|                      | Fragmented |            |            | ns         | ns         | *    |
| Dynamic              | Continuous |            |            |            | ***        | ns   |
|                      | Fragmented |            |            |            |            | ***  |

| mdx Endplate Damage |            | Stable     |            | Dynamic    |            | Lost |
|---------------------|------------|------------|------------|------------|------------|------|
|                     |            | Continuous | Fragmented | Continuous | Fragmented |      |
| Stable              | Continuous |            | ns         | ns         | ***        | *    |
|                     | Fragmented |            |            | **         | ***        | ***  |
| Dynamic             | Continuous |            |            |            | ***        | ns   |
|                     | Fragmented |            |            |            |            | ***  |
