# Supplementary material for: Cycles of myofiber degeneration and regeneration lead to remodeling of the neuromuscular junction in two mammalian models of Duchenne muscular dystrophy
Source: PubMed Central journal article supplement (PMC6209224; doi:10.1371/journal.pone.0205926), 2018-10-31
Supplement: pone.0205926.s008.pdf [file pone.0205926.s008.pdf]

| mdx Internal Control |            | Stable     |            | Dynamic    |            | Lost |
|----------------------|------------|------------|------------|------------|------------|------|
|                      |            | Continuous | Fragmented | Continuous | Fragmented |      |
| Stable               | Continuous |            | *          | *          | ns         | ***  |
|                      | Fragmented |            |            | ns         | **         | *    |
| Dynamic              | Continuous |            |            |            | ***        | ns   |
|                      | Fragmented |            |            |            |            | ***  |

| mdx Denervation |            | Stable     |            | Dynamic    |            | Lost |
|-----------------|------------|------------|------------|------------|------------|------|
|                 |            | Continuous | Fragmented | Continuous | Fragmented |      |
| Stable          | Continuous |            | ***        | *          | *          | ***  |
|                 | Fragmented |            |            | ***        | ns         | ns   |
| Dynamic         | Continuous |            |            |            | ***        | ***  |
|                 | Fragmented |            |            |            |            | *    |
